# Supplementary material for: The Swedish childhood tumor biobank: systematic collection and molecular characterization of all pediatric CNS and other solid tumors in Sweden
Source: PubMed Central journal article supplement (PMC10204274; doi:10.1186/s12967-023-04178-4), 2023-05-23

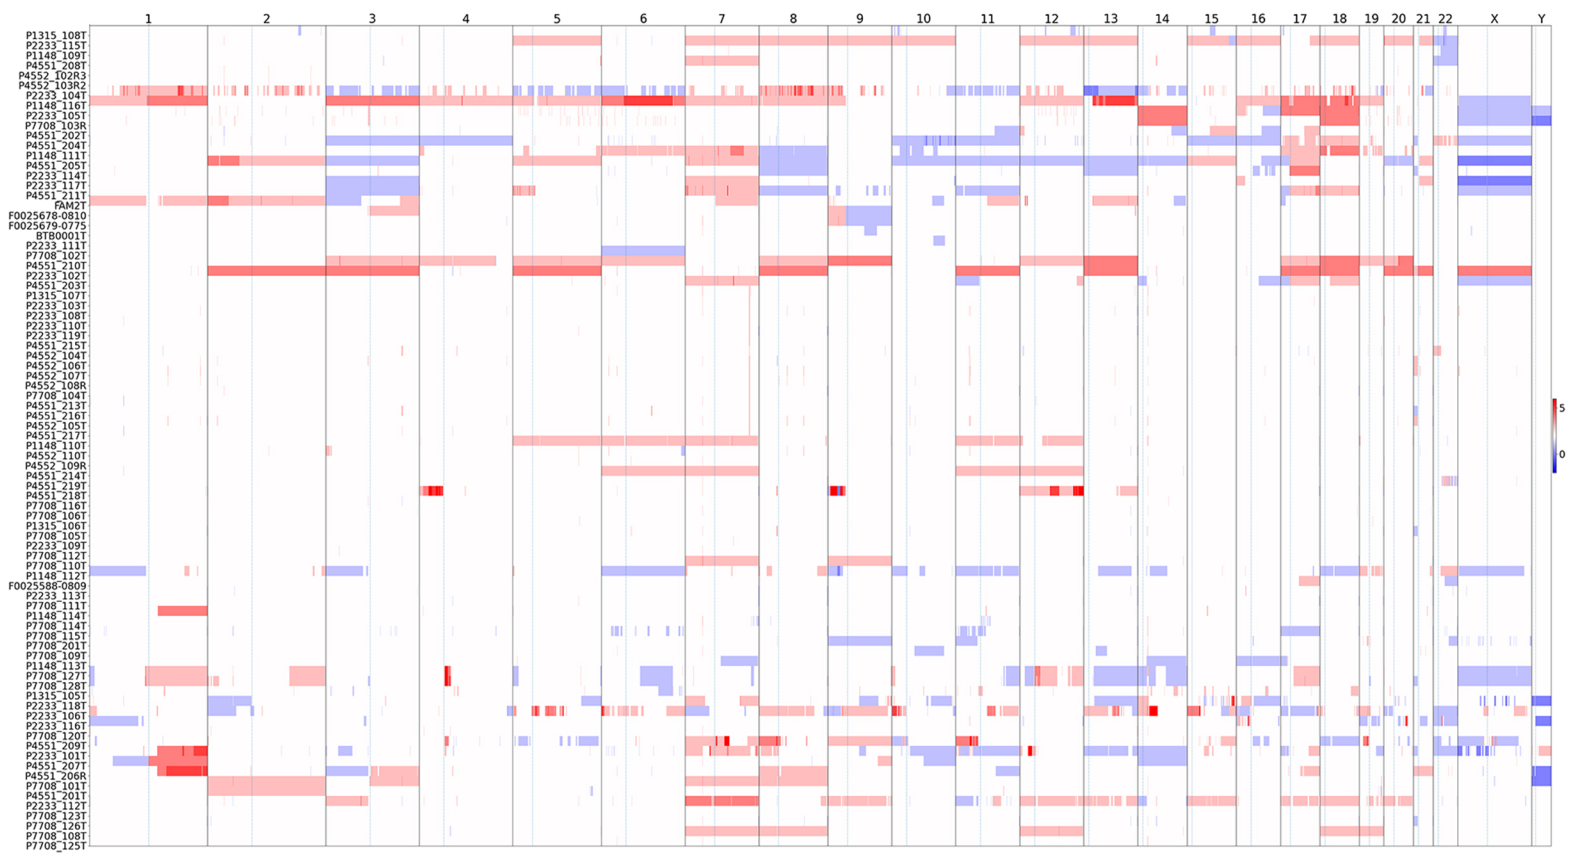

Supplement: 12967_2023_4178_MOESM5_ESM.pdf [file 12967_2023_4178_MOESM5_ESM.pdf]
